# Supplementary material for: BICC1 interacts with PKD1 and PKD2 to drive cystogenesis in ADPKD
Source: eLife journal article supplement (doi:10.7554/elife.106342), 2025-06-11
Supplement: fig1-data1 [file Figure 1 Source Data 1D.pdf › Figure 1 Source Data 1/Figure 1 Source Data 1D.pdf]

Figure 1–Source Data 1D

Figure 1 D

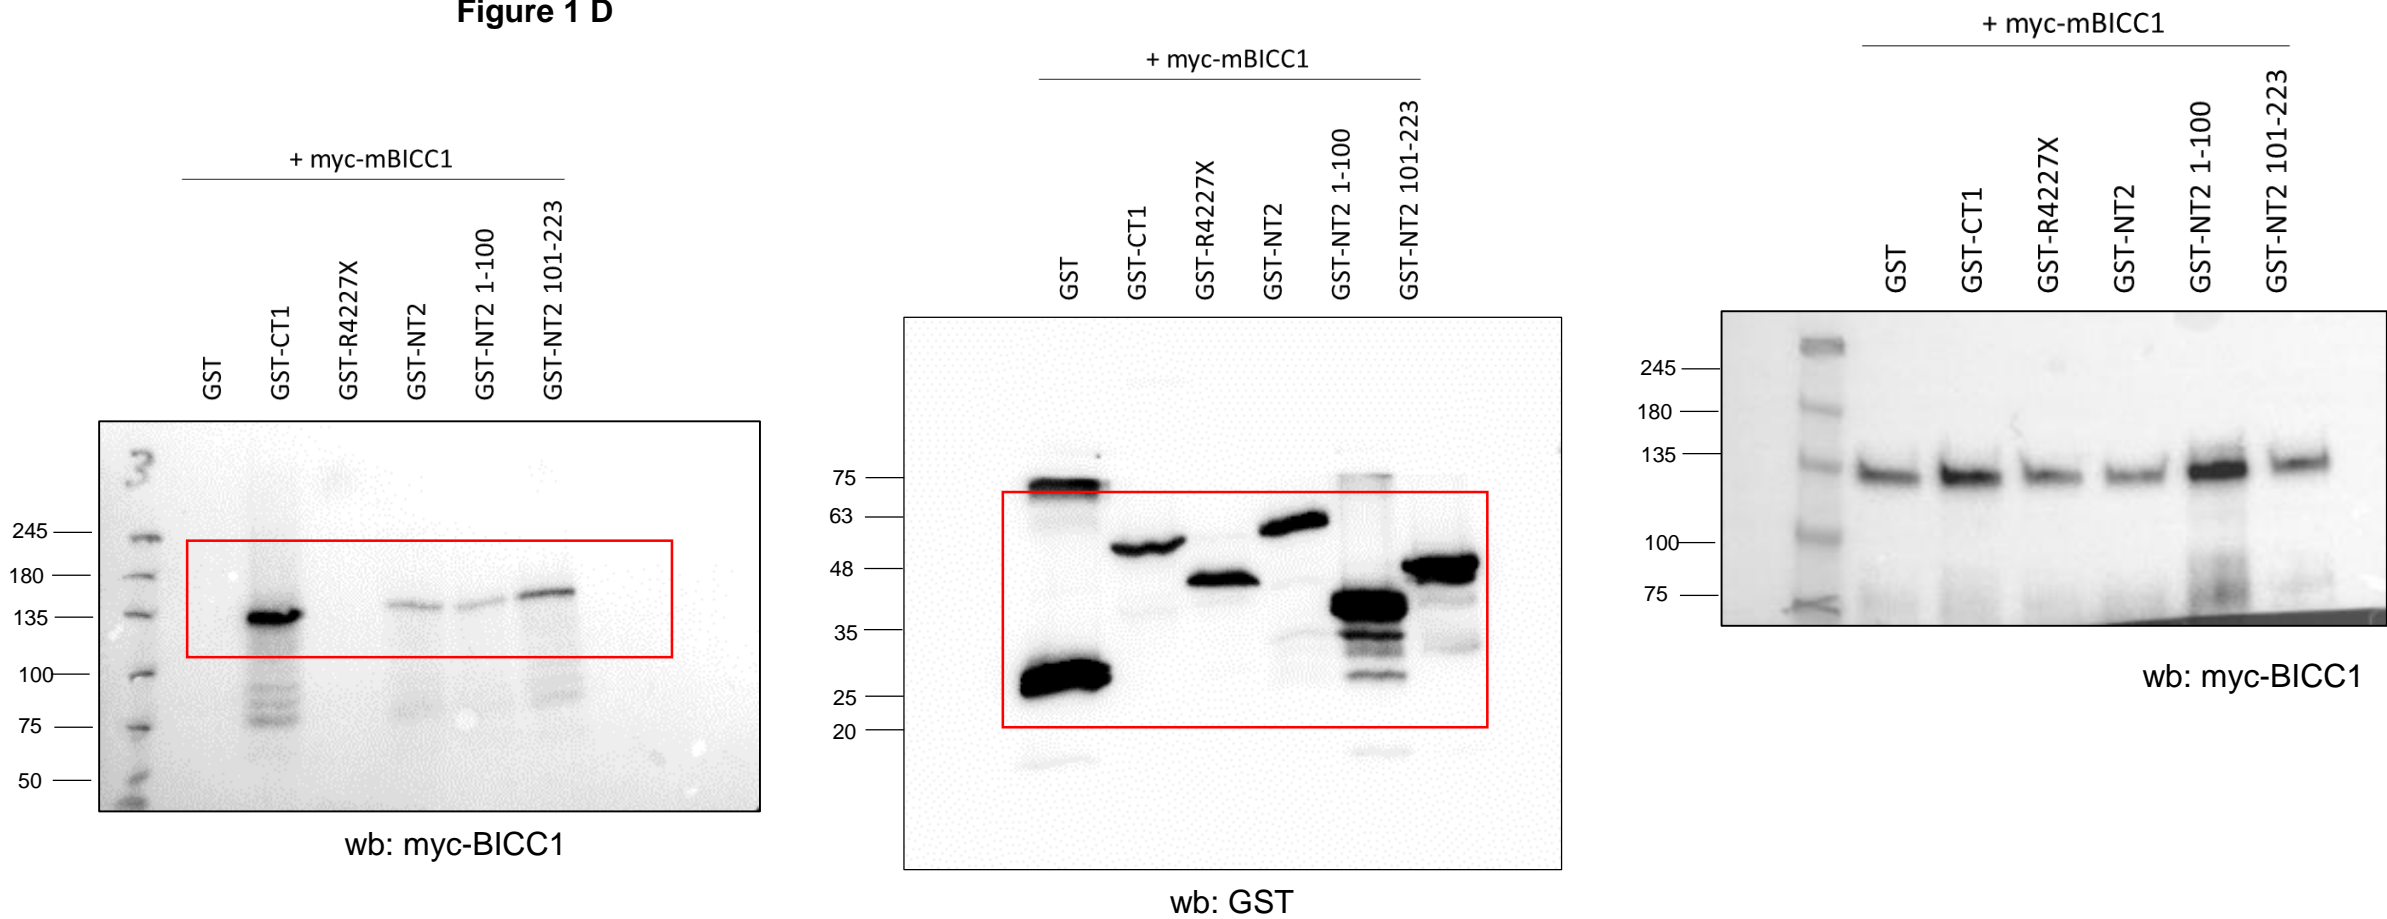

Figure 1, Source Data 1D. Original membranes corresponding to Figure 1, panel D
