# Supplementary material for: BICC1 interacts with PKD1 and PKD2 to drive cystogenesis in ADPKD
Source: eLife journal article supplement (doi:10.7554/elife.106342), 2025-06-11
Supplement: fig2-data1 [file Figure 2 Source Data 2D.pdf › Figure 2 Source Data 1/Figure 2 Source Data 2D.pdf]

Figure 2—Source Data 2D

Figure 2 D

|                | HA IP |   |   |   |   |   |   |
|----------------|-------|---|---|---|---|---|---|
| HA-PC2         | +     | - | - | - | + | + | + |
| mBICC1-myc     | -     | + | - | - | + | - | - |
| BICC1-ΔKH-myc  | -     | - | + | - | - | + | - |
| BICC1-ΔSAM-myc | -     | - | - | + | - | - | + |
| pcDNA3         | +     | + | + | + | - | - | - |

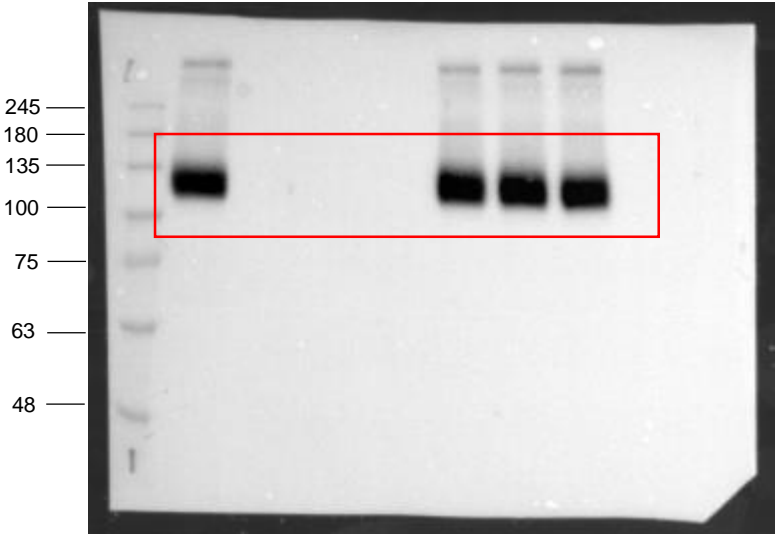

HA-PC2

|                | HA IP |   |   |   |   |   |   |
|----------------|-------|---|---|---|---|---|---|
| HA-PC2         | +     | - | - | - | + | + | + |
| mBICC1-myc     | -     | + | - | - | + | - | - |
| BICC1-ΔKH-myc  | -     | - | + | - | - | + | - |
| BICC1-ΔSAM-myc | -     | - | - | + | - | - | + |
| pcDNA3         | +     | + | + | + | - | - | - |

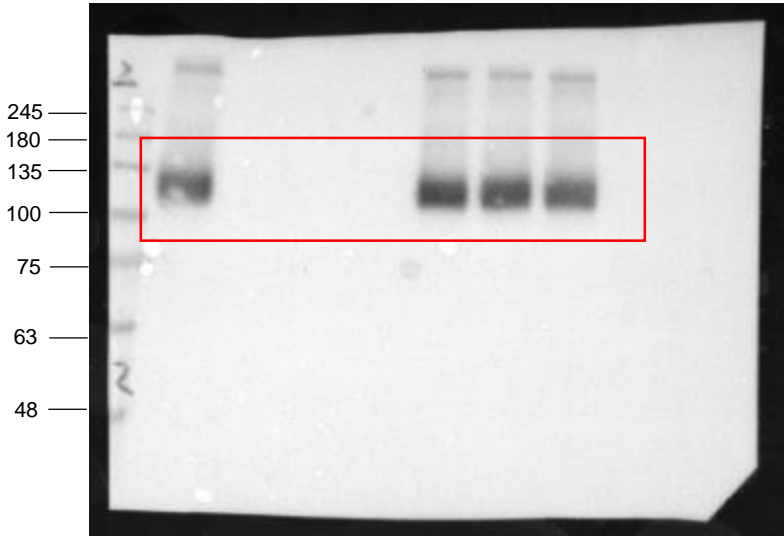

HA-PC2

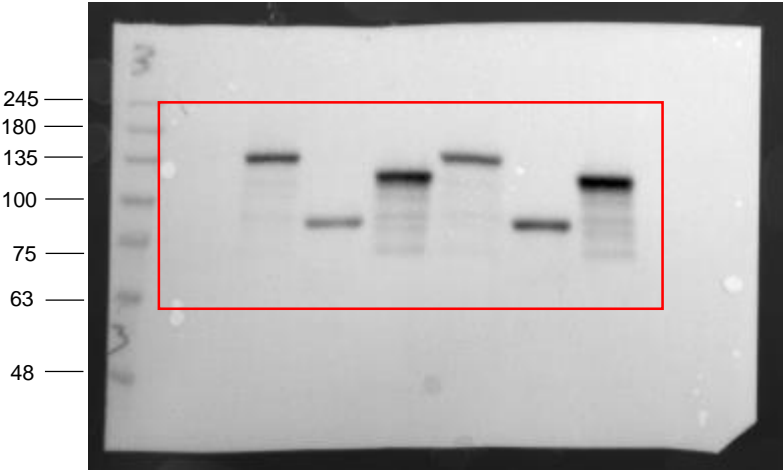

myc-mBICC1  
myc-mBICC1-ΔSAM  
myc-mBICC1-ΔKH

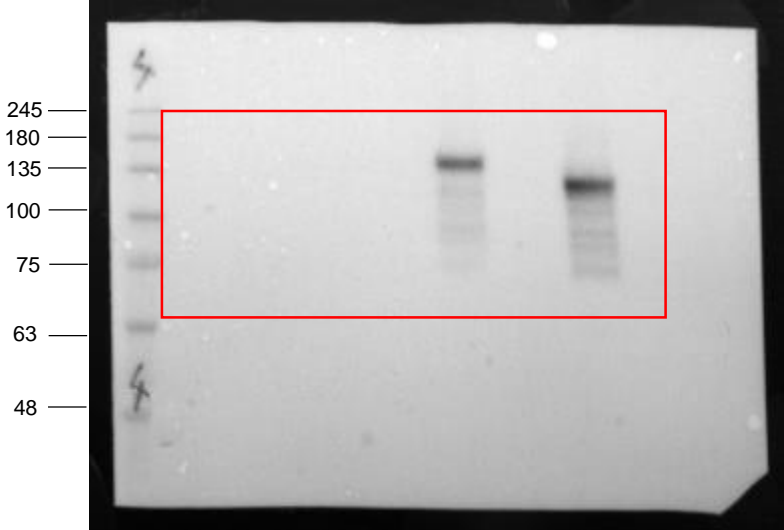

myc-mBICC1  
myc-mBICC1-ΔSAM  
myc-mBICC1-ΔKH

Figure 2, Source Data 2D. Original membranes corresponding to Figure 2, panel D
