# Supplementary material for: BICC1 interacts with PKD1 and PKD2 to drive cystogenesis in ADPKD
Source: eLife journal article supplement (doi:10.7554/elife.106342), 2025-06-11
Supplement: fig2-data1 [file Figure 2 Source Data 2F.pdf › Figure 2 Source Data 1/Figure 2 Source Data 2F.pdf]

Figure 2—Source Data 2F

Figure 2 F

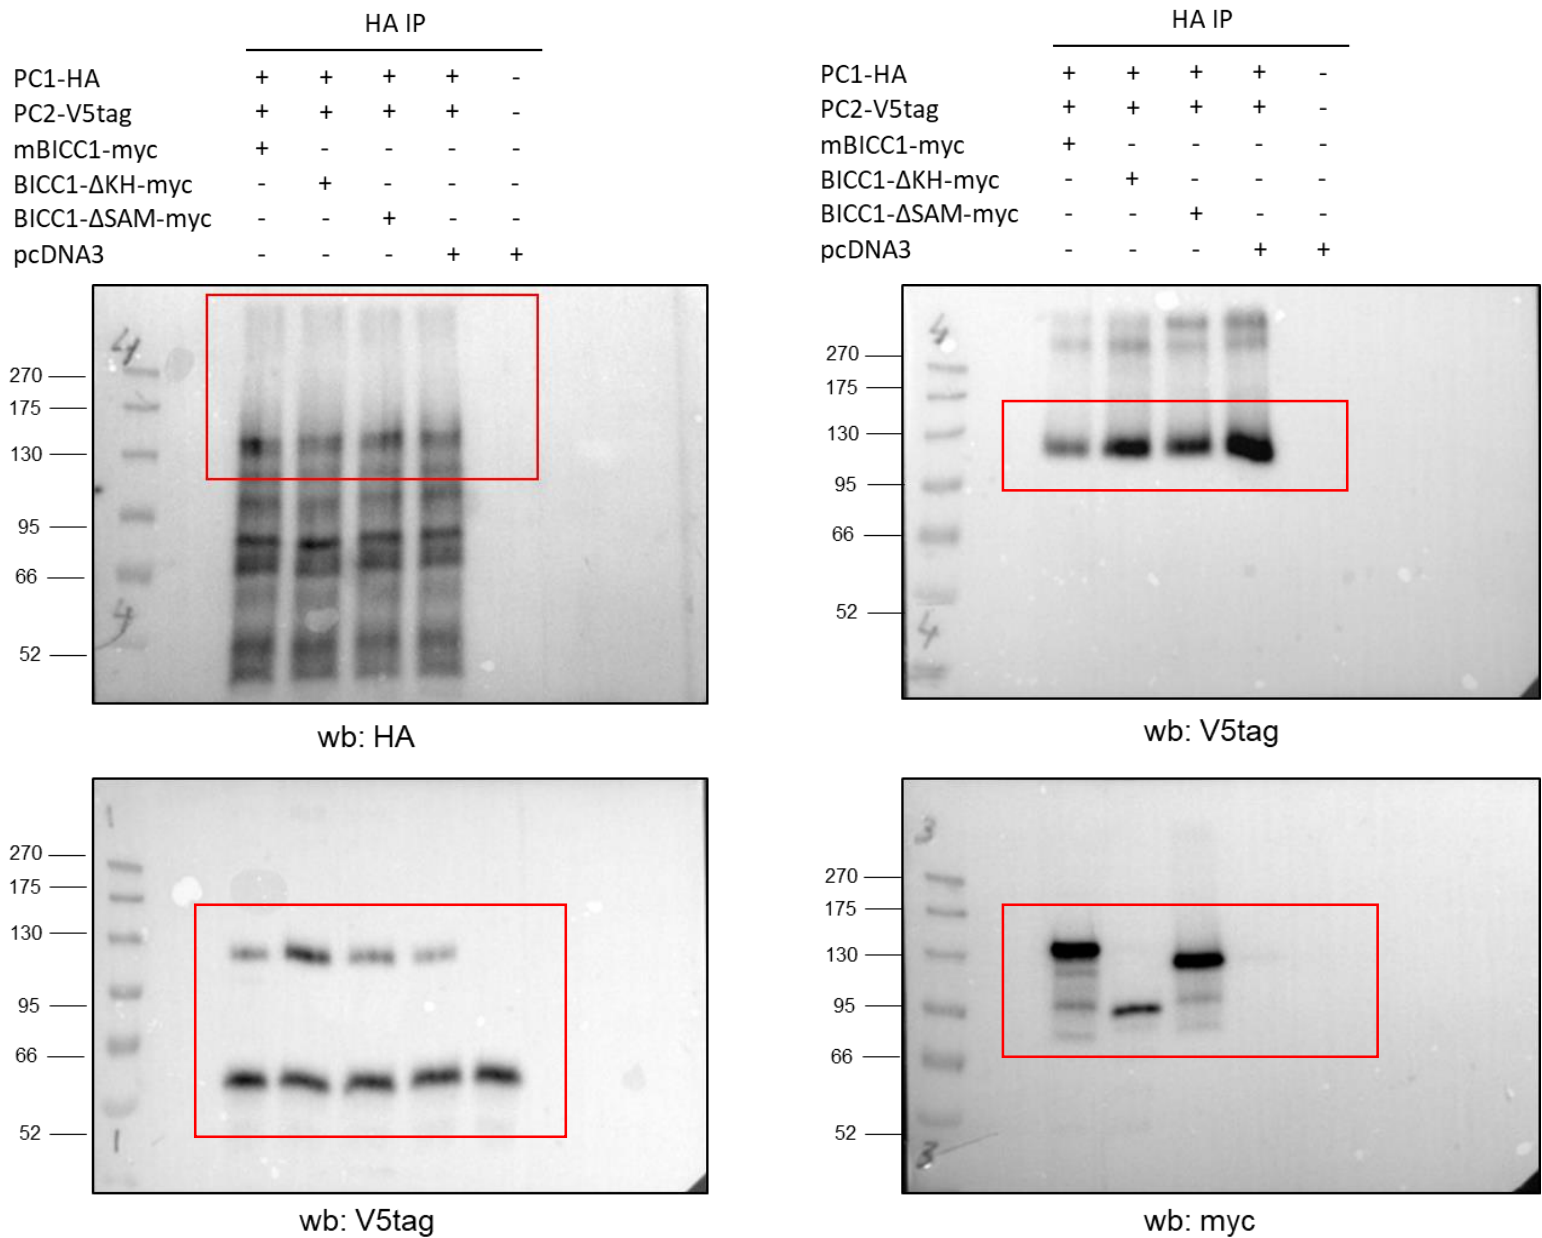

Figure 2, Source Data 2F. Original membranes corresponding to Figure 2, panel F
