# Supplementary figures and images for: BICC1 interacts with PKD1 and PKD2 to drive cystogenesis in ADPKD
Source: eLife journal article supplement (doi:10.7554/elife.106342), 2025-06-11

Figure 1 B

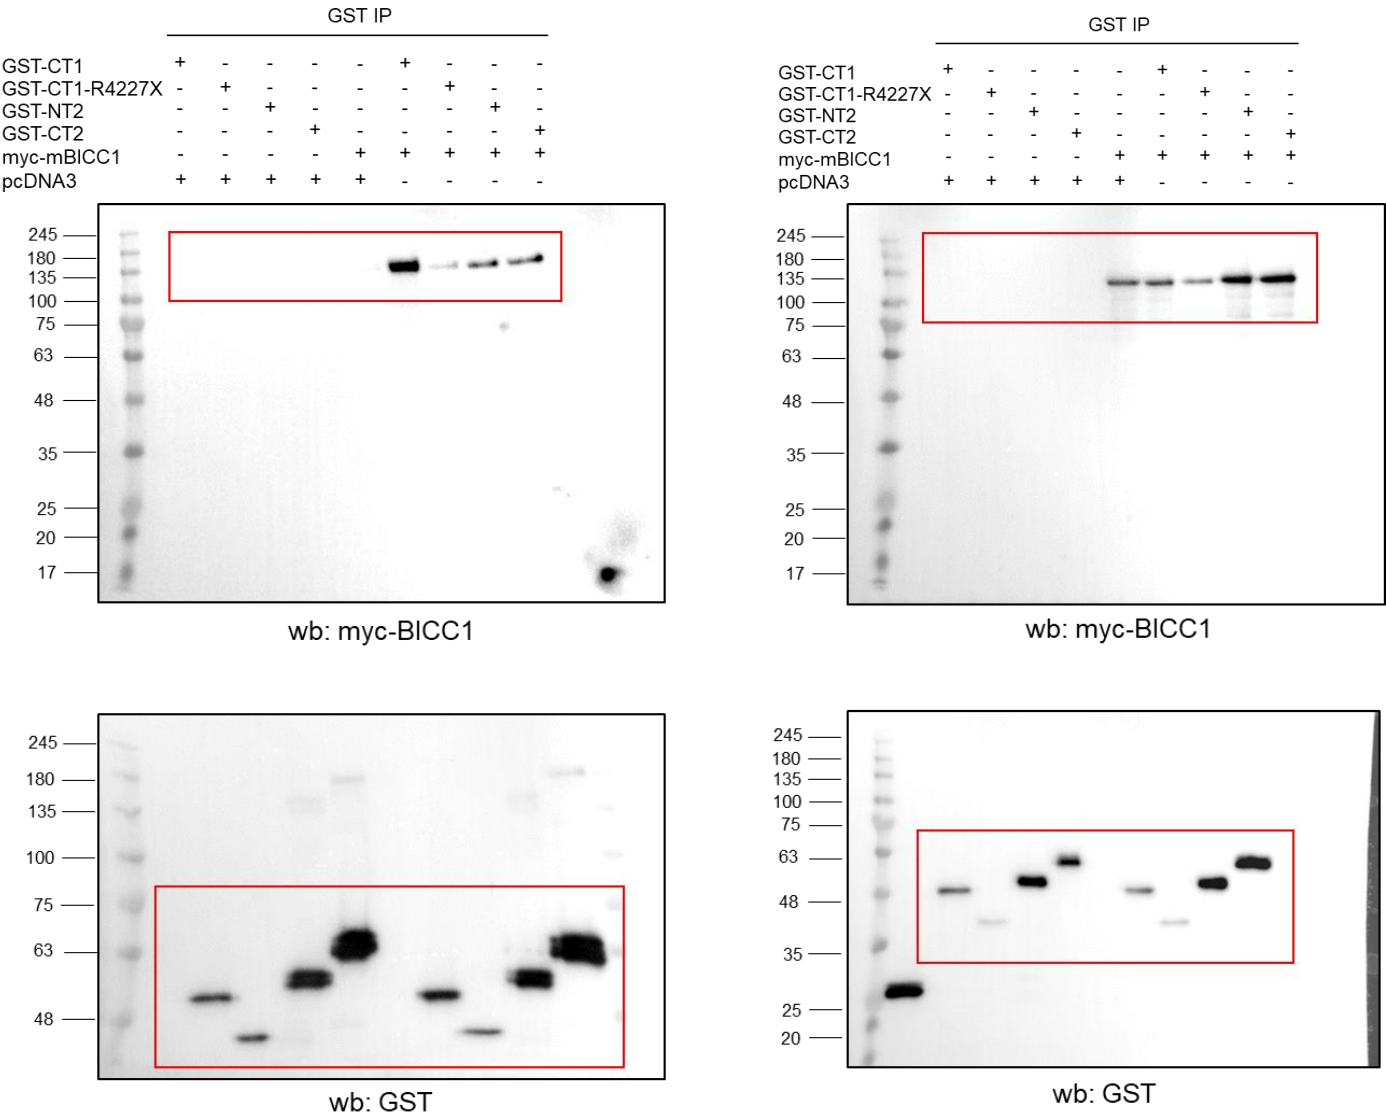

Figure 1, Source Data 1. Original membranes corresponding to Figure 1, panel B

Supplement: fig1-data1 [file Figure 1 Source Data 1B.pdf › Figure 1 Source Data 1/Figure 1 Source Data 1B.pdf]

Figure 1–Source Data 1C

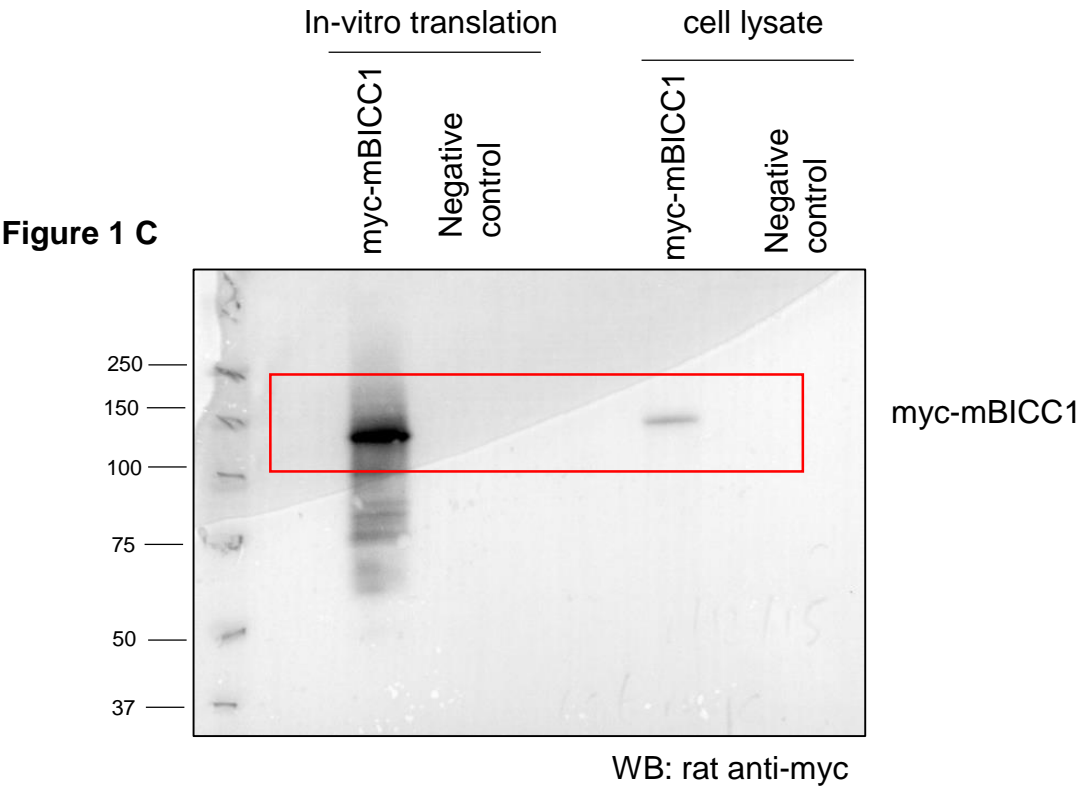

Figure 1, Source Data 1C. Original membranes corresponding to Figure 1, panel C

Supplement: fig1-data1 [file Figure 1 Source Data 1C.pdf › Figure 1 Source Data 1/Figure 1 Source Data 1C.pdf]

Figure 1 G

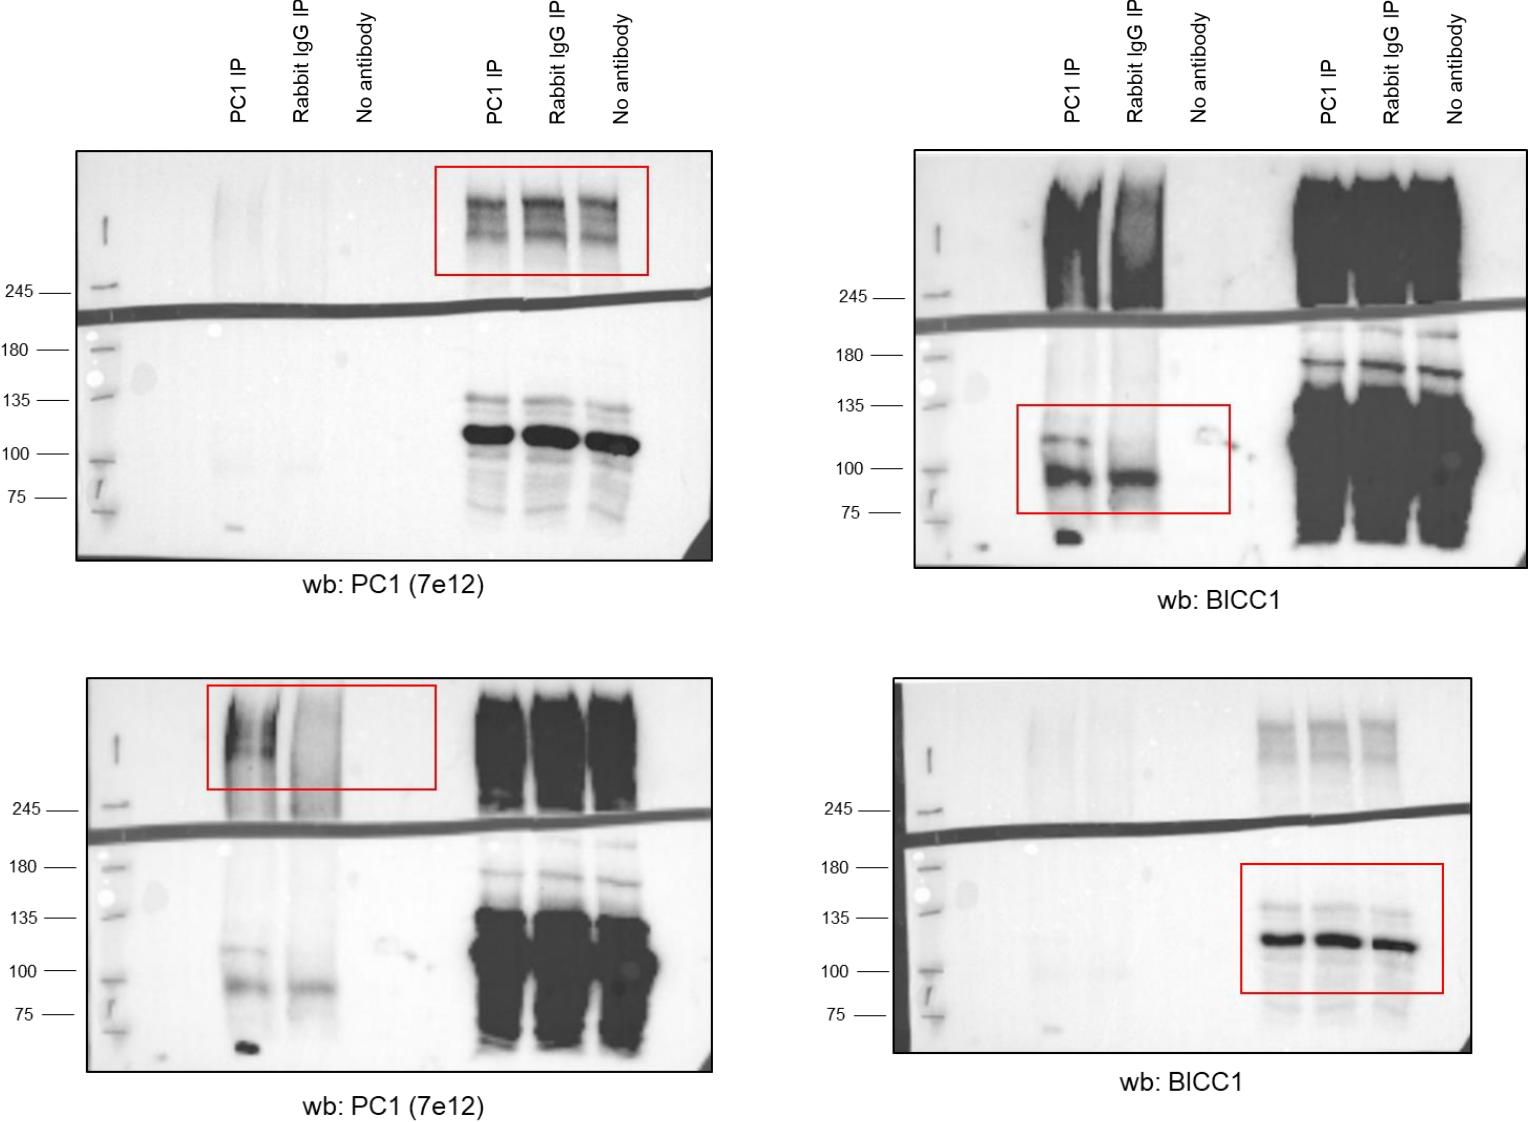

Figure 1, Source Data 1G. Original membranes corresponding to Figure 1, panel G

Supplement: fig1-data1 [file Figure 1 Source Data 1G.pdf › Figure 1 Source Data 1/Figure 1 Source Data 1G.pdf]

Figure 2 B

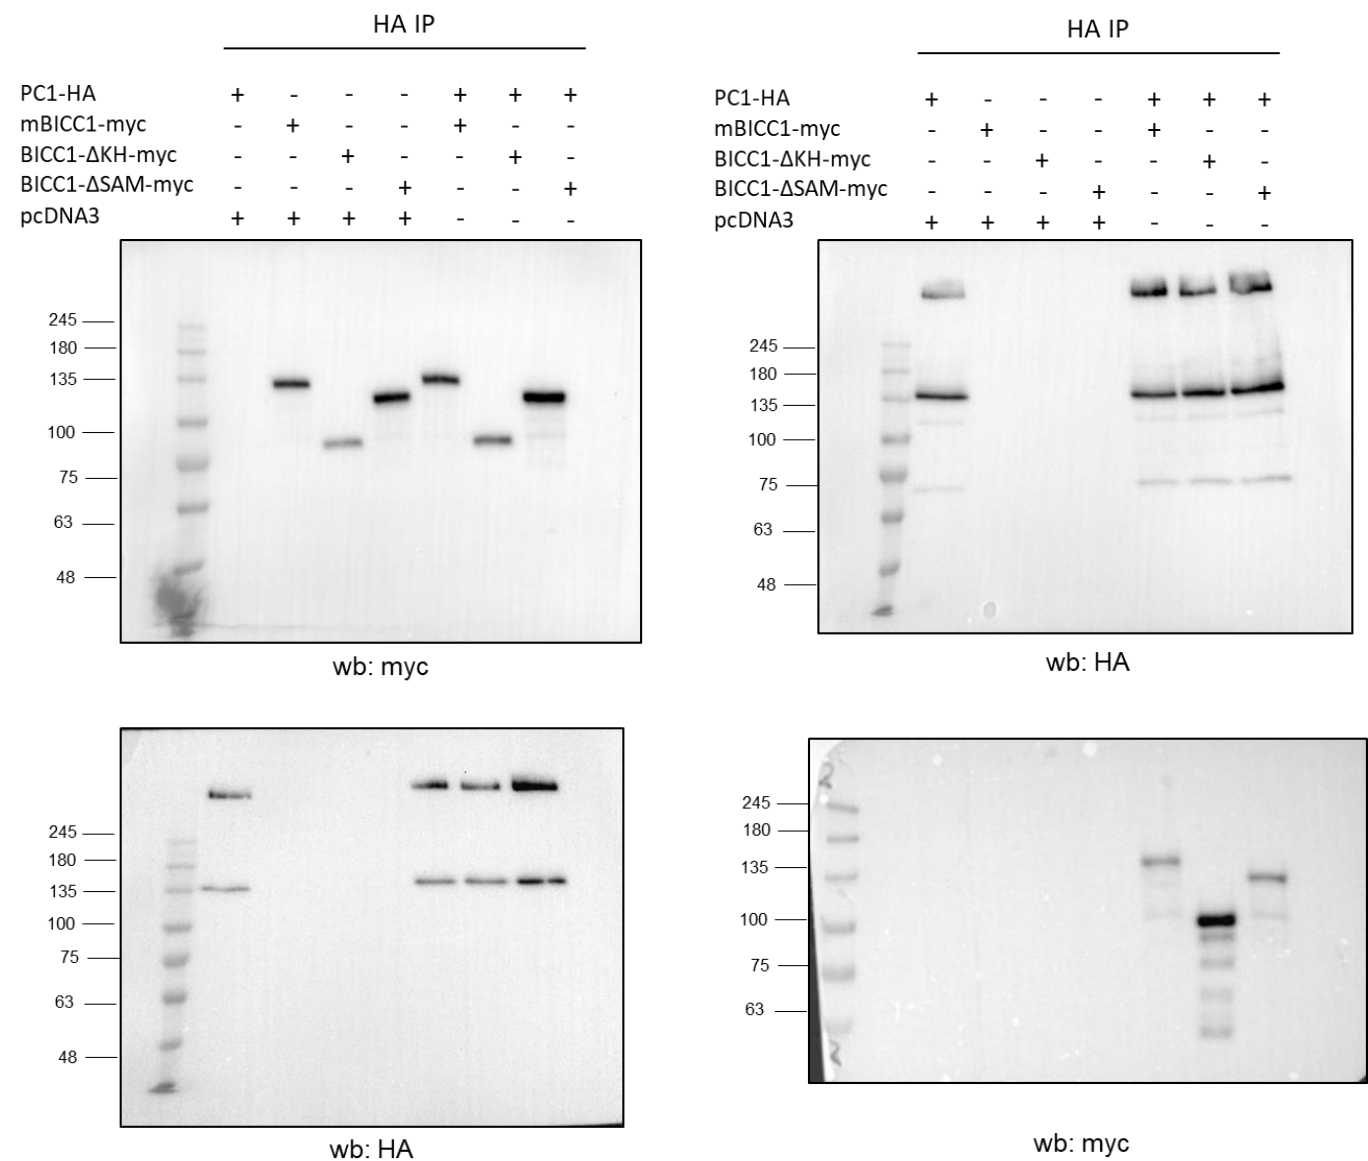

Figure 2, Source Data 2B. Original membranes corresponding to Figure 2, panel B

Supplement: fig2-data1 [file Figure 2 Source Data 2B.pdf › Figure 2 Source Data 1/Figure 2 Source Data 2B.pdf]
